# Supplementary material for: Difference in Body Weight at Breeding Affects Reproductive Performance in Replacement Beef Heifers and Carries Consequences to Next Generation Heifers
Source: MDPI journal article supplement (doi:10.3390/ani11102800), 2021-09-26
Supplement: s1 [file s1]

# Supplementary Materials: Difference in Body Weight at Breeding Affects Reproductive Performance in Replacement Beef Heifers and Carries Consequences in Next Generation Heifers

Ramanathan Kasimanickam <sup>1,\*</sup>, Vanmathy Kasimanickam <sup>1,2</sup> and Madison McCann <sup>1</sup>

<sup>1</sup> Department of Veterinary Clinical Sciences, College of Veterinary Medicine, Washington State University, Pullman, WA 99164, USA; vkasiman@wsu.edu (V.K.); madison.mccann@wsu.edu (M.M.)

<sup>2</sup> AARVEE Animal Biotech LLC, Corvallis, OR 97333, USA

\* Correspondence: ramkasi@wsu.edu

**Table S1.** Hay analysis 1.

| Contents                          | As Received | 100% DM |
|-----------------------------------|-------------|---------|
| Moisture, %                       | 9.4         | -       |
| Dry Matter, %                     | 90.6        | -       |
| Crude Protein, %                  | 9.1         | 10.0    |
| Acid Detergent Fiber, %           | 34.2        | 37.7    |
| Crude Fat, %                      | 1.1         | 1.2     |
| Ash, %                            | 9.7         | 10.7    |
| Total Digestible Nutrients, % TDN | 54.9        | 60.6    |
| Net Energy, Maint., Mcal/lb       | 0.54        | 0.60    |
| Net Energy, Gain, Mcal/lb         | 0.31        | 0.34    |
| Net Energy, Lact., Mcal/lb        | 0.56        | 0.62    |
| Digestible Energy, Mcal/lb        | 1.10        | 1.21    |
| Met. Energy, Beef, Mcal/lb        | 0.90        | 1.00    |

**Table S2.** Hay analysis 2.

| Contents                          | As Received | 100% DM |
|-----------------------------------|-------------|---------|
| Moisture, %                       | 8.7         | -       |
| Dry Matter, %                     | 91.3        | -       |
| Crude Protein, %                  | 9.8         | 10.7    |
| Acid Detergent Fiber, %           | 30.4        | 33.3    |
| Crude Fat, %                      | 1.3         | 1.5     |
| Ash, %                            | 9.0         | 9.9     |
| Total Digestible Nutrients, % TDN | 59.4        | 65.1    |
| Net Energy, Maint., Mcal/lb       | 0.61        | 0.67    |
| Net Energy, Gain, Mcal/lb         | 0.37        | 0.40    |
| Net Energy, Lact., Mcal/lb        | 0.61        | 0.67    |
| Digestible Energy, Mcal/lb        | 1.19        | 1.30    |
| Met. Energy, Beef, Mcal/lb        | 0.98        | 1.07    |

**Table S3.** Mean body weight (kg) at weaning and at breeding, and average daily gain for dam heifers across locations.

| Location    | Weight Group (MBW*) | <i>n</i> | Weight at Weaning, kg | Weigh at Breeding, kg | ADG, kg |
|-------------|---------------------|----------|-----------------------|-----------------------|---------|
| Location 1  | 55                  | 195      | 235                   | 299                   | 0.8     |
|             | 65                  | 188      | 233                   | 352                   | 1.5     |
| Location 2  | 55                  | 98       | 236                   | 305                   | 0.9     |
|             | 65                  | 91       | 236                   | 349                   | 1.4     |
| Location 3  | 55                  | 88       | 238                   | 307                   | 0.9     |
|             | 65                  | 92       | 235                   | 351                   | 1.5     |
| Location 4  | 55                  | 211      | 237                   | 308                   | 0.9     |
|             | 65                  | 202      | 236                   | 346                   | 1.4     |
| Location 5  | 55                  | 114      | 235                   | 306                   | 0.9     |
|             | 65                  | 102      | 235                   | 350                   | 1.4     |
| Location 6  | 55                  | 79       | 236                   | 309                   | 0.9     |
|             | 65                  | 69       | 233                   | 345                   | 1.4     |
| Location 7  | 55                  | 154      | 237                   | 308                   | 0.9     |
|             | 65                  | 159      | 236                   | 354                   | 1.5     |
| Location 8  | 55                  | 94       | 232                   | 306                   | 0.9     |
|             | 65                  | 97       | 232                   | 349                   | 1.5     |
| Location 9  | 55                  | 132      | 238                   | 303                   | 0.8     |
|             | 65                  | 128      | 234                   | 347                   | 1.4     |
| Location 10 | 55                  | 110      | 235                   | 304                   | 0.9     |
|             | 65                  | 102      | 233                   | 351                   | 1.5     |
| Location 11 | 55                  | 121      | 238                   | 303                   | 0.8     |
|             | 65                  | 112      | 235                   | 347                   | 1.4     |
| Location 12 | 55                  | 114      | 236                   | 304                   | 0.9     |
|             | 65                  | 118      | 233                   | 350                   | 1.5     |
| Total       | 55                  | 112      | 236                   | 305                   | 0.9     |
|             | 65                  | 118      | 234                   | 349                   | 1.4     |

\* Mature body weight, 545 kg.

**Table S4.** Mean body weight (kg) at weaning and at breeding, and average daily gain for dam heifers across years.

| Year  | Weight Group, (MBW *) | Weight at Weaning, kg | Weigh at Breeding, kg | ADG, kg |
|-------|-----------------------|-----------------------|-----------------------|---------|
| 2015  | 55                    | 236                   | 304                   | 0.9     |
|       | 65                    | 232                   | 347                   | 1.4     |
| 2016  | 55                    | 234                   | 301                   | 0.8     |
|       | 65                    | 234                   | 349                   | 1.4     |
| 2017  | 55                    | 237                   | 305                   | 0.9     |
|       | 65                    | 236                   | 350                   | 1.4     |
| 2018  | 55                    | 238                   | 307                   | 0.9     |
|       | 65                    | 236                   | 351                   | 1.4     |
| 2019  | 55                    | 236                   | 308                   | 0.9     |
|       | 65                    | 234                   | 348                   | 1.4     |
| Total | 55                    | 236                   | 305                   | 0.9     |
|       | 65                    | 234                   | 349                   | 1.4     |

\* Mature body weight, 545 kg.
